# Supplementary material for: ZnO Nanorods as Antireflection Layers in Metal-Insulator-Semiconductor Solar Cells
Source: MDPI journal article supplement (doi:10.3390/electronics11132068), 2022-07-01
Supplement: s1 [file s1]

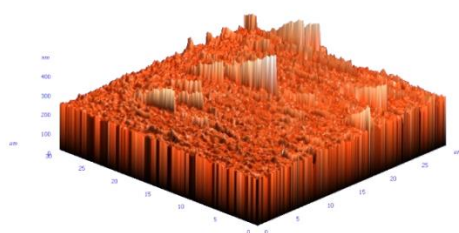

(a)

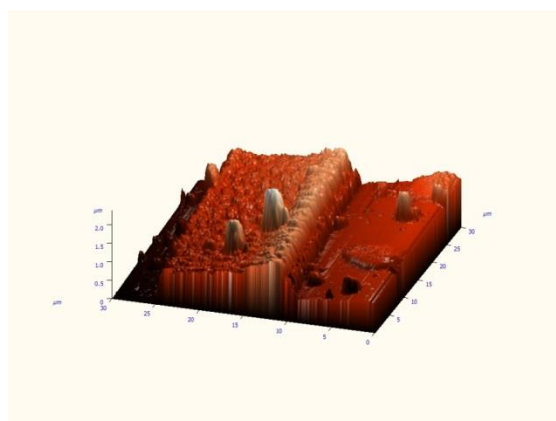

(b)

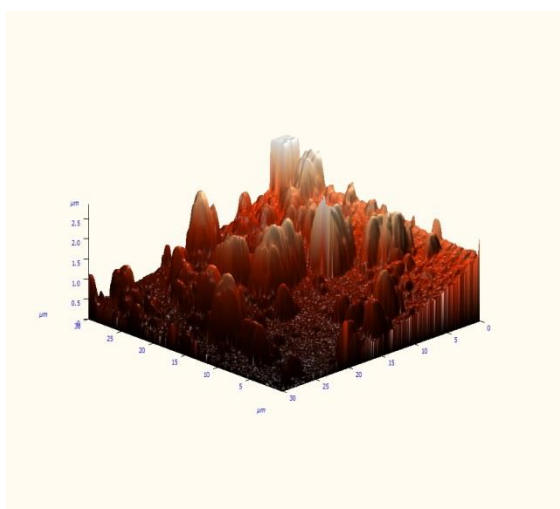

(c)

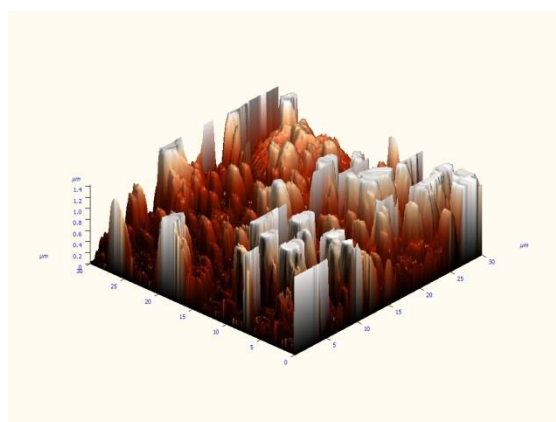

(d)

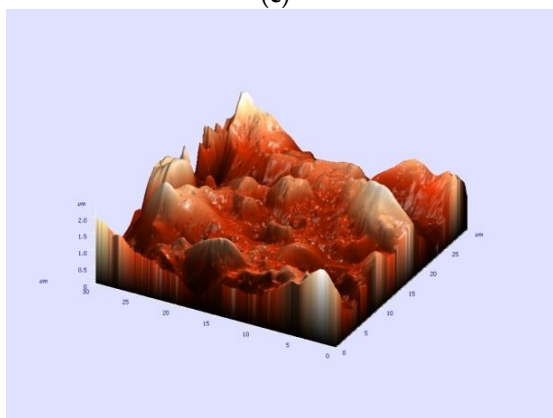

(e)

**Figure S1.** The AFM images of ZnO nanorods for different growth times: (a) 0 min (uncoated); (b) 15 min; (c) 30 min; (d) 60 min; (e) 120 min. (Bruker, Dimension ICON, Tucson, AZ, USA)
